# Supplementary material for: Association between tax on sugar sweetened beverages and soft drink consumption in adults in Mexico: open cohort longitudinal analysis of Health Workers Cohort Study
Source: PubMed Central journal article supplement — BMJ. 2020 May 6;369:m1311. doi: 10.1136/bmj.m1311 (PMC7201935; doi:10.1136/bmj.m1311), 2020-05-06
Supplement: sanl053121.ww1.pdf [file sanl053121.ww1.pdf]

**Associations between Mexico's sugar-sweetened beverages tax and soft drinks consumption in adults: an open cohort longitudinal analysis of the Health Workers Cohort Study**

Luz María Sánchez-Romero (<https://orcid.org/0000-0001-7951-3965>); Francisco Canto-Osorio; Romina González-Morales; M. Arantxa Colchero; Shu-Wen Ng; Paula Ramírez-Palacios, Jorge Salmerón; Tonatiuh Barrientos-Gutiérrez.

## APPENDIX 1

**Table A1- 1. Distribution of The Health Workers Cohort Study sample by exclusion criteria**

| Exclusion Criteria                         | Wave 1: 2003 | Wave 2: 2010 | Wave 3: 2017 |
|--------------------------------------------|--------------|--------------|--------------|
| N by wave                                  | 1579         | 2141         | 1214         |
| Less than 19 years old                     | 169          | 199          | 98           |
| Pregnant                                   | 5            | 2            | 0            |
| SSB consumption not reported               | 18           | 44           | 65           |
| Total Kcal intake <600 kcal                | 5            | 25           | 31           |
| SSB daily intake $\geq 1500$ ml            | 12           | 9            | 5            |
| Other (no dates of interview)              | 2            | 4            | 5            |
| Observations with missing co-variates data | 165          | 235          | 50           |
| <b>Total analytical sample</b>             | <b>1203</b>  | <b>1623</b>  | <b>960</b>   |

The OLCRE model uses level-1 independent variables in their original form ( $x_{it}$ ). It assumes that the non-time varying level-2 error term ( $\vartheta_i$ ) depends on ( $x_{it}$ ) via the mean across observations of the same individual ( $\bar{x}_i$ ). In our case, the model equation was fit as follows (1):

$$g(\mu_{it}) = \beta_w x_{it} + (\beta_\beta - \beta_w) \bar{x}_i + \gamma c_i + \vartheta_i, \text{ where}$$

$g(\mu_{it})$  denotes the ordered log-odds of being in a given soft drink consumption category for the individual  $i$  at time  $t$  (vs. being in a lower category of consumption);

$\beta_w x_{it}$  denotes the estimated within-individual effect ( $\beta_w$ ) given repeated measures per individual ( $i$ ) over time ( $t$ ), for a vector of time-varying covariates;

$\beta_\beta$  denotes the estimated between individual effect;

$(\beta_\beta - \beta_w)$  denotes the comparison of the within- and between- effects (difference effects),

$\bar{x}_i$  denotes the vector of means of each time varying covariate across observations of the same individual;

$\gamma c_i$  denotes the coefficient of the variable that varies only between individuals (age at baseline/time invariant covariates)

The OLCRE model produces ordered log-odds of the within and difference effects, that we transformed to proportional odds ratios. For this paper, our main focus is on the within-individual effect ( $\beta_w x_{it}$ ) and time-invariant ( $\gamma c_i$ ) coefficients of the SSBs tax. The difference-effect coefficients ( $(\beta_\beta - \beta_w) \bar{x}_i$ ) refer to the product of subtracting the within -effect coefficient from the between effect coefficient. It tells us whether individual unobserved heterogeneity matters and corrects for it but is not a main outcome of interest.

Between-effects are not displayed when using this OLCRE STATA command. We recommend that readers use caution in interpreting the difference-effect log-odds coefficients. Due to the characteristics of our variables (panel data), these coefficients do not offer a contextual effect for our analysis and the interpretation can be deceiving. More information about their understanding can be found in Schunck, R. 2017(1) and Bell, A 2019(2).

**Table A1-2. Summary of the ordered logistic regression effects of the sugar sweetened beverages tax on soft drink consumption, adjusted by covariates (n=3786) from the Health Workers Cohort Study.**

| Soft Drink Consumption categories    | Within effects (W) |                         | Difference effects (D) <sup>†</sup> |                         |
|--------------------------------------|--------------------|-------------------------|-------------------------------------|-------------------------|
|                                      | Odds Ratio         | 95% Confidence Interval | Odds Ratio                          | 95% Confidence Interval |
| Tax                                  | 0.385              | (0.159 to 0.937)        | 1.080                               | (0.302 to 3.856)        |
| Time (years)                         | 1.076              | (0.933 to 0.969)        | 0.860                               | (0.740 to 0.999)        |
| Age at baseline*time                 | 0.999              | (0.998 to 1.000)        | 1.001                               | (0.997 to 1.005)        |
| Education                            |                    |                         |                                     |                         |
| <i>Elementary school or less</i>     | Ref                |                         | Ref                                 |                         |
| <i>Middle and high school</i>        | 0.243              | (0.066 to 0.896)        | 5.632                               | (1.419 to 22.360)       |
| <i>College and higher</i>            | 0.161              | (0.036 to 0.726)        | 3.689                               | (0.763 to 17.846)       |
| Income                               |                    |                         |                                     |                         |
| <i>Low</i>                           | Ref                |                         | Ref                                 |                         |
| <i>Middle</i>                        | 2.027              | (1.245 to 3.300)        | 0.431                               | (0.236 to 0.785)        |
| <i>High</i>                          | 2.062              | (1.141 to 3.726)        | 0.385                               | (0.190 to 0.779)        |
| Temperature (Celsius)                | 1.023              | (0.979 to 1.068)        | 0.951                               | (0.867 to 1.044)        |
| Gross domestic product               | 0.999              | (0.999 to 1.000)        | 1.001                               | (1.000 to 1.001)        |
| Inflation                            | 0.859              | (0.722 to 1.022)        | 1.098                               | (0.708 to 1.702)        |
| Age at baseline (years) <sup>‡</sup> | 0.951              | (0.933 to 0.969)        |                                     |                         |

Proportional odds ratios from the OLCRE Model 1. <sup>†</sup>Difference effects estimated as difference of the estimated within and between-individual coefficients. <sup>‡</sup> Variable that only vary between individuals (time-invariant).

**Table A1-3. Summary of the ordered logistic regression effects on soft drinks consumption categories including an interaction between tax and income**

| Soft Drink Consumption categories | Within effects (W) |                         | Difference effects (D) <sup>†</sup> |                         |
|-----------------------------------|--------------------|-------------------------|-------------------------------------|-------------------------|
|                                   | Odds Ratio         | 95% Confidence Interval | Odds Ratio                          | 95% Confidence Interval |
| Tax                               | 0.520              | (0.203 to 1.332)        | 0.691                               | (0.158 to 3.016)        |
| Income                            |                    |                         |                                     |                         |
| <i>Low</i>                        | Ref                |                         | Ref                                 |                         |
| <i>Middle</i>                     | 2.477              | (1.448 to 4.237)        | 0.352                               | (0.186 to 0.664)        |
| <i>High</i>                       | 2.503              | (1.319 to 4.750)        | 0.284                               | (0.128 to 0.630)        |
| Tax*income                        |                    |                         | 1.518                               | (0.749 to 3.075)        |
| <i>Low</i>                        | Ref                |                         |                                     |                         |
| <i>Middle</i>                     | 0.629              | (0.066 to 0.384)        |                                     |                         |
| <i>High</i>                       | 0.691              | (0.133 to 0.427)        |                                     |                         |

|                                      |       |                  |       |                   |
|--------------------------------------|-------|------------------|-------|-------------------|
| Time (years)                         | 1.073 | (0.942 to 1.222) | 0.862 | (0.742 to 1.001)  |
| Age at baseline*time                 | 0.999 | (0.997 to 1.000) | 1.001 | (0.997 to 1.006)  |
| Education                            |       |                  |       |                   |
| <i>Elementary school or less</i>     | Ref   |                  | Ref   |                   |
| <i>Middle and high school</i>        | 0.241 | (0.065 to 0.893) | 5.673 | (1.425 to 22.588) |
| <i>College and higher</i>            | 0.161 | (0.036 to 0.728) | 3.688 | (0.759 to 17.910) |
| Temperature (Celsius)                | 1.021 | (0.978 to 1.066) | 0.952 | (0.867 to 1.044)  |
| Gross domestic product               | 0.999 | (0.999 to 1.000) | 1.001 | (1.000 to 1.001)  |
| Inflation                            | 0.870 | (0.731 to 1.035) | 1.087 | (0.700 to 1.686)  |
| Age at baseline (years) <sup>‡</sup> | 0.951 | (0.932 to 0.969) |       |                   |

Proportional odds ratios from the OLCRE Model. †Difference effects estimated as difference of the estimated within and between-individual coefficients. ‡ Variable that only vary between individuals (time-invariant).

**Table A1-4. Summary of the regression effects on soft drinks consumption categories including an interaction between tax and education**

| Soft Drink Consumption categories    | Within effects (W) |                         | Difference effects (D) <sup>†</sup> |                         |
|--------------------------------------|--------------------|-------------------------|-------------------------------------|-------------------------|
|                                      | Odds Ratio         | 95% Confidence Interval | Odds Ratio                          | 95% Confidence Interval |
| Tax                                  | 0.696              | (0.257 to 1.885)        | 1.447                               | (0.122 to 17.211)       |
| Education                            |                    |                         |                                     |                         |
| <i>Elementary school or less</i>     | Ref                |                         | Ref                                 |                         |
| <i>Middle and high school</i>        | 0.280              | (0.075 to 1.038)        | 5.943                               | (1.480 to 23.855)       |
| <i>College and higher</i>            | 0.183              | (0.041 to 0.827)        | 3.872                               | (0.769 to 19.511)       |
| <b>Tax*education</b>                 |                    |                         | 0.900                               | (0.368 to 2.201)        |
| <i>Elementary school or less</i>     | Ref                |                         |                                     |                         |
| <i>Middle and high school</i>        | 0.437              | (0.245 to 0.781)        |                                     |                         |
| <i>College and higher</i>            | 0.518              | (0.289 to 0.931)        |                                     |                         |
| Time (years)                         | 1.078              | (0.946 to 1.228)        | 0.855                               | (0.736 to 0.993)        |
| Age at baseline*time                 | 0.998              | (0.997 to 1.000)        | 1.001                               | (0.997 to 1.005)        |
| Income                               |                    |                         |                                     |                         |
| <i>Low</i>                           | Ref                |                         | Ref                                 |                         |
| <i>Middle</i>                        | 2.063              | (1.266 to 3.362)        | 0.425                               | (0.233 to 0.776)        |
| <i>High</i>                          | 2.127              | (1.176 to 3.848)        | 0.374                               | (0.184 to 0.760)        |
| Temperature (Celsius)                | 1.020              | (0.977 to 1.065)        | 0.953                               | (0.868 to 1.045)        |
| Gross domestic product               | 0.999              | (0.999 to 1.000)        | 1.001                               | (1.000 to 1.001)        |
| Inflation                            | 0.877              | (0.736 to 1.044)        | 1.088                               | (0.700 to 1.690)        |
| Age at baseline (years) <sup>‡</sup> | 0.953              | (0.935 to 0.972)        |                                     |                         |

Proportional odds ratios from the OLCRE model. †Difference effects estimated as difference of the estimated within and between-individual coefficients. ‡ Variable that only vary between individuals (time-invariant).

## References

1. Schunck R. Within- and between-cluster effects in generalized linear mixed models: A discussion of approaches and the xthybrid command. *The Stata Journal*. 2017;17(1):89-115.
2. Bell A, Fairbrother M, Jones K. Fixed and random effects models: making an informed choice. *Quality & Quantity*. 2019;53:1051-74.

**APPENDIX 2**  
**Sensitivity Analysis**

**Table A2-1. Matched sample characteristics of the Health Workers Cohort sample for each wave of data collection**

| Variables                              | Wave 1<br>2004 | Wave 2<br>2010 | Wave 3<br>2017 |
|----------------------------------------|----------------|----------------|----------------|
| N                                      | 650            | 650            | 650            |
| Age at baseline                        | 47.5 ±12.2     | 47.5 ±12.2     | 47.5 ±12.2     |
| Male (%)                               | 21.5           | 21.7           | 21.8           |
| Time in the cohort (years)             | 0              | 7.0 ± 1.1      | 12.4 ± 1.0     |
| Education (%)                          |                |                |                |
| <i>Elementary school or less</i>       | 15.4           | 14.8           | 13.7           |
| <i>Secondary school or High-school</i> | 38.3           | 36.8           | 36.2           |
| <i>College and higher</i>              | 46.3           | 48.5           | 50.2           |
| Income (%)                             |                |                |                |
| <i>Low</i>                             | 33.3           | 33.3           | 33.5           |
| <i>Middle</i>                          | 34.0           | 34.2           | 41.7           |
| <i>High</i>                            | 32.7           | 32.6           | 24.8           |
| Temperature (°C)                       | 24.9 ± 1.9     | 25.5 ± 2.1     | 23.7 ± 2.5     |
| Annual Gross Domestic Product (GDP)    | 7697.7 ± 363.3 | 9435.1 ± 366.0 | 9267.0 ± 100.0 |
| Inflation (%)                          | 4.1 ±0.6       | 3.3 ±0.2       | 4.6 ±0.7       |

**Table A2-2 Summary of the ordered logistic regression effects of the sugar sweetened beverages tax on soft drink consumption, adjusted by covariates using the matched Health Workers Cohort Study sample.**

| Soft Drink<br>Consumption categories | Within effects (W) |                         | Difference effects (D)† |                         |
|--------------------------------------|--------------------|-------------------------|-------------------------|-------------------------|
|                                      | Odds Ratio         | 95% Confidence Interval | Odds Ratio              | 95% Confidence Interval |
| Tax                                  | 0.261              | (0.085 to 0.801)        | NULL*                   |                         |
| Time (years)                         | 1.163              | (0.845 to 1.212)        | 0.873                   | (0.577 to 1.322)        |
| Age at baseline*time                 | 0.999              | (0.998 to 1.001)        | 0.993                   | (0.965 to 1.021)        |
| Education                            |                    |                         |                         |                         |
| <i>Elementary school or less</i>     | Ref                |                         | Ref                     |                         |
| <i>Middle and high school</i>        | 0.249              | (0.056 to 1.114)        | 5.176                   | (1.000 to 26.792)       |
| <i>College and higher</i>            | 0.272              | (0.047 to 1.591)        | 2.241                   | (0.330 to 15.199)       |
| Income                               |                    |                         |                         |                         |
| <i>Low</i>                           | Ref                |                         | Ref                     |                         |

|                           |               |       |                  |       |                  |
|---------------------------|---------------|-------|------------------|-------|------------------|
|                           | <i>Middle</i> | 1.636 | (0.998 to 2.682) | 0.589 | (0.275 to 1.262) |
|                           | <i>High</i>   | 1.725 | (0.911 to 3.266) | 0.373 | (0.152 to 0.910) |
| Temperature (Celsius)     |               | 1.055 | (1.000 to 1.112) | 0.863 | (0.729 to 1.021) |
| Gross domestic product    |               | 0.999 | (0.998 to 1.000) | 1.002 | (1.001 to 1.003) |
| Inflation                 |               | 0.855 | (0.698 to 1.046) | 1.239 | (0.606 to 2.532) |
| Age at baseline (years) ‡ |               | 1.012 | (0.845 to 1.212) |       |                  |

Proportional odds ratios from the OLCRE Model 1 using only individuals with consumption data for the three HWCS waves (matched). †Difference effects estimated as difference of the estimated within and between-individual coefficients. ‡ Variable that only vary between individuals (time-invariant).

\*All individuals (n=650) in the matched sample were exposed to the tax 1/3 of their time, thus, this model estimates within-individual effects but the between individual component is null, rendering null results for the difference-effects.
